# Supplementary material for: Identification of resistance to cobweb disease caused byCladobotryum mycophilumin wild and cultivated strains ofAgaricus bisporusand screening for bioactive botanicals
Source: Royal Society of Chemistry journal article supplement (doi:10.1039/c9ra00632j), 2019-01-01

Table S1. Comparison between the Control and Inoculated (*C. mycophilum*) treatments regarding yield loss for Wild and Commercial strains of *A. bisporus*.

| Commercial strain | Type       | Mean         | t-value | Wild Strains | Type       | Mean         | t-value |
|-------------------|------------|--------------|---------|--------------|------------|--------------|---------|
| CCMJ1020          | Control    | 661.89±72.61 | 2.31    | CCMJ1106     | Control    | 390.23±24.97 | 1.58**  |
|                   | Inoculated | 533.00±63.53 |         |              | Inoculated | 341.95±46.52 |         |
| CCMJ1028          | Control    | 471.92±36.67 | 3.25*   | CCMJ1369     | Control    | 440.99±24.87 | 4.13*   |
|                   | Inoculated | 367.50±41.88 |         |              | Inoculated | 330.18±39.24 |         |
| CCMJ1352          | Control    | 665.65±17.17 | 9.67**  | CCMJ1384     | Control    | 532.76±44.99 | 1.54    |
|                   | Inoculated | 481.00±28.25 |         |              | Inoculated | 487.33±24.31 |         |
| CCMJ1021          | Control    | 547.98±85.32 | 2.53    | CCMJ1361     | Control    | 449.13±63.38 | 1.47    |
|                   | Inoculated | 396.08±59.64 |         |              | Inoculated | 378.65±53.94 |         |
| CCMJ1033          | Control    | 611.82±69.07 | 1.76    | CCMJ1350     | Control    | 532.82±52.15 | 1.86    |
|                   | Inoculated | 517.74±61.67 |         |              | Inoculated | 448.88±58.39 |         |
| CCMJ1037          | Control    | 467.93±52.18 | 3.99*   | CCMJ1363     | Control    | 469.30±58.39 | 1.09    |
|                   | Inoculated | 343.45±14.13 |         |              | Inoculated | 413.83±48.64 |         |
| CCMJ1039          | Control    | 555.67±69.69 | 2.12    | CCMJ1351     | Control    | 528.26±49.24 | 1.18    |
|                   | Inoculated | 414.57±91.96 |         |              | Inoculated | 492.25±19.36 |         |
| CCMJ1053          | Control    | 508.18±59.78 | 2.79*   | CCMJ1360     | Control    | 403.46±29.50 | 1.65    |
|                   | Inoculated | 379.38±52.99 |         |              | Inoculated | 325.83±75.97 |         |
| CCMJ1035          | Control    | 609.27±20.20 | 5.72**  | CCMJ1381     | Control    | 364.19±36.17 | 3.06*   |
|                   | Inoculated | 421.83±52.99 |         |              | Inoculated | 289.24±22.19 |         |
| CCMJ1109          | Control    | 706.83±25.64 | 7.74**  | CCMJ1377     | Control    | 412.70±52.15 | 2.62    |
|                   | Inoculated | 428.49±56.75 |         |              | Inoculated | 320.04±31.94 |         |
| CCMJ1009          | Control    | 780.34±40.25 | 8.80**  | CCMJ1347     | Control    | 462.50±28.11 | 4.73**  |
|                   | Inoculated | 537.93±25.64 |         |              | Inoculated | 347.76±31.21 |         |
| CCMJ1343          | Control    | 685.00±75.69 | 2.40    | CCMJ1110     | Control    | 719.06±31.43 | 7.14**  |
|                   | Inoculated | 560.17±48.63 |         |              | Inoculated | 581.46±11.17 |         |
| CCMJ1013          | Control    | 590.58±71.52 | 2.73    | CCMJ1372     | Control    | 412.64±20.21 | 3.48*   |
|                   | Inoculated | 412.61±87.27 |         |              | Inoculated | 334.64±33.15 |         |
| CCMJ1018          | Control    | 486.93±99.29 | 1.50**  | CCMJ1374     | Control    | 473.94±96.63 | 1.12    |
|                   | Inoculated | 394.15±39.51 |         |              | Inoculated | 409.80±22.27 |         |
| CCMJ1038          | Control    | 474.34±57.96 | 2.23**  | CCMJ1379     | Control    | 430.40±33.70 | 1.99    |
|                   | Inoculated | 369.15±57.73 |         |              | Inoculated | 343.25±67.81 |         |

Non-significant (P>0.05); \* = Significant (P<0.05); \*\* = Highly significant (P<0.01)

Fig. S2: Screening of botanicals

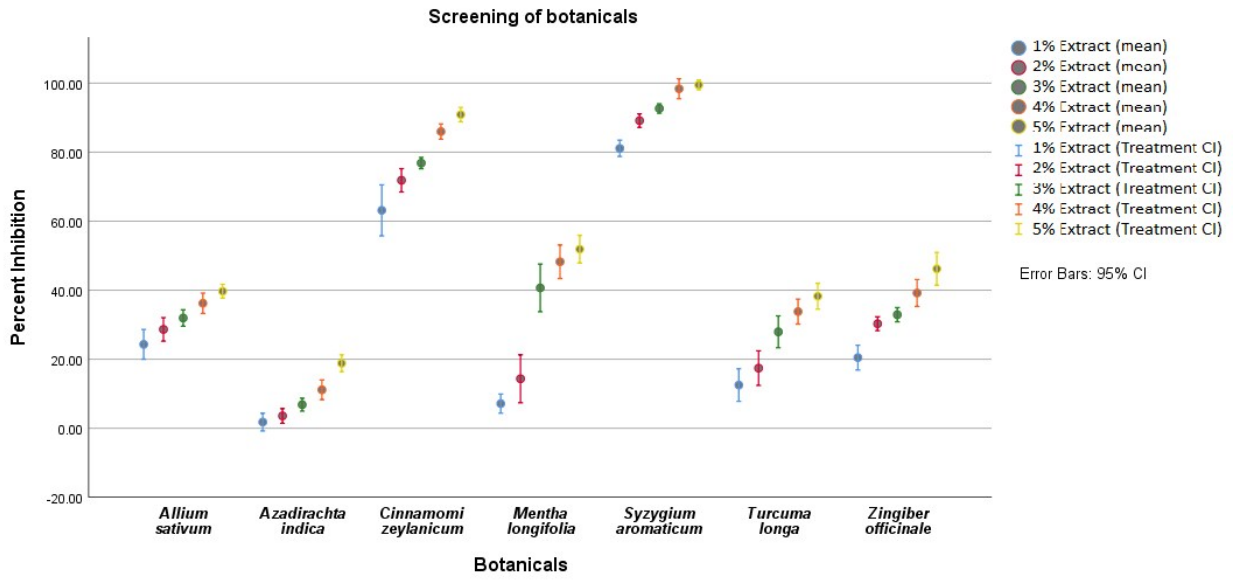

Supplement: c9ra00632j1.pdf [file c9ra00632j1.pdf]
